# Supplementary material
Source: publisher figshare collection journal article supplement (https://springernature.figshare.com/ndownloader/files/35117732)
Supplement: Supplementary file [file 35117732]

## Supplementary File 3: Tools and techniques for search strategy

| Technique                                                                                                                                       | Command                                  | Example                                                                                                                                                                                  |
|-------------------------------------------------------------------------------------------------------------------------------------------------|------------------------------------------|------------------------------------------------------------------------------------------------------------------------------------------------------------------------------------------|
| All known synonyms and acronyms of keyword                                                                                                      |                                          | <i>socioeconomic position may include socioeconomic status, income, SES, SEP etc.</i>                                                                                                    |
| Truncation – used to find variant word endings                                                                                                  | “root word”*                             | <i>depriv* includes deprivation and deprived</i>                                                                                                                                         |
| Wildcard – used to replace a character within a word to enable alternative spellings to be included                                             | ?                                        | <i>marginali?ed includes marginalised and marginalised</i>                                                                                                                               |
| Boolean operators – to combine keywords and subject headings within a key concept, and to combine different key concepts                        | “OR”<br>“AND”                            | <i>social position OR social status will identify articles containing either of these terms;<br/>social capital AND health status disparities will identify articles with both terms</i> |
| Searching title, abstract and keyword fields – this will also include current articles to be retrieved that do not yet have MeSH terms assigned | (free-text word search string).ti,ab,kw. | <i>(health inequ* or health status dispar*).ti,ab.kw.</i>                                                                                                                                |
